## **Title: CRISPR knockdown of GABA<sub>A</sub> alpha3 subunits on thalamic reticular neurons enhances deep sleep**

**Authors:** David S. Uygun<sup>1</sup>, Chun Yang<sup>1</sup>, Elena R. Tilli<sup>2</sup>, Fumi Katsuki<sup>1</sup>, James T. McKenna<sup>1</sup>, James M. McNally<sup>1</sup>, Ritchie E. Brown<sup>1</sup>†, Radhika Basheer<sup>1\*</sup>†.

### 5 **Affiliations:**

<sup>1</sup>VA Boston Healthcare System and Harvard Medical School, Dept. of Psychiatry, West Roxbury, MA 02132, USA.

<sup>2</sup> Stonehill College, Department of Psychology, Easton, MA 02357, USA

\*Correspondence to: radhika\_basheer@hms.harvard.edu

10 † Equally contributing senior authors.

### **Abstract:**

15 Identification of mechanisms which increase deep sleep could lead to novel treatments which promote the restorative effects of sleep. Here, knockdown of the  $\alpha 3$  GABA<sub>A</sub>-receptor subunit from parvalbumin neurons in the thalamic reticular nucleus using CRISPR-Cas9 gene editing increased non-rapid-eye-movement (NREM) sleep and the thalamocortical delta oscillations implicated in many health-promoting effects of sleep. Inhibitory synaptic currents were strongly reduced *in vitro*. Effects were selective to the mouse sleep (light) period. Further analysis identified a novel deep-sleep state in mice prior to NREM-REM transitions which was preferentially affected by deletion of  $\alpha 3$  subunits. Our results identify a functional role for GABA<sub>A</sub> receptors on TRN neurons and suggest antagonism of  $\alpha 3$  subunits as a strategy to enhance deep sleep.

### **One Sentence Summary:**

Selective genetic knockdown of the major  $\alpha$  subunit of GABA<sub>A</sub> receptors present in the thalamic reticular nucleus enhanced deep sleep in mice.

### 25 **Main Text:**

Sleep is vital for maintaining physical and mental well-being. In particular, thalamocortical delta (0.5-4 Hz) oscillations present in deep non-rapid-eye-movement (NREM) sleep are implicated in a wide range of processes beneficial to health including synaptic homeostasis, cellular energy regulation, clearance of toxic proteins, cognitive performance and mood (1-4). Conversely, insomnia, traumatic brain injury, obstructive sleep apnea, and other brain disorders are associated with interrupted/fragmented sleep, reduced deep NREM sleep and decreased delta wave power (5-8). Although hypnotic agents which potentiate the activity of GABA<sub>A</sub> receptors promote sleep induction, they also reduce delta oscillations, suggesting that a subset of GABA<sub>A</sub> receptors prevents deep restorative sleep (9, 10). Thus, identification and elimination of this confounding effect of the most widely used hypnotics, which target GABA<sub>A</sub> receptors, could be beneficial in developing sleep drugs which boost the positive effects of sleep. Recent work showed the thalamic reticular nucleus (TRN) plays a role in modulating delta power (11). Here we used state-of-the-art CRISPR-Cas9 gene editing to test the hypothesis that GABA<sub>A</sub> receptors on TRN neurons suppress NREM sleep delta oscillations.

40 In the adult brain, most GABA<sub>A</sub>Rs consist of two  $\alpha$  subunits ( $\alpha 1-6$ ), two  $\beta$  subunits  
( $\beta 1-3$ ), and one  $\gamma$  subunit ( $\gamma 1-3$ ) (12) (**Fig. 1A**). In the mouse thalamus, all synaptic GABA<sub>A</sub>Rs  
in thalamocortical relay nuclei contain  $\alpha 1$ , whereas GABA<sub>A</sub>Rs in the TRN contain  $\alpha 3$  (13). To  
45 introduce a brain region and cell-type-specific ablation of the  $\alpha 3$  subunit gene, we first generated  
mice which expressed the Cas9 endonuclease in the major subset of TRN neurons which contain  
the calcium-binding protein parvalbumin (PV) by crossing PV-Cre mice with Rosa26-Lox-stop-  
lox-Cas9-GFP mice to produce PV-Cas9-GFP offspring. Next, we analyzed the gene sequence of  
50 the  $\alpha 3$  subunit and selected three loci close to the start codon as target regions expected to  
maximize CRISPR-Cas9 mediated ablation (**Fig. 1A**). We then constructed an adeno-associated  
viral (AAV) vector to target the obligatory  $\alpha 3$  subunit (AAV5- $\alpha 3$ -sgRNA-mCherry) by  
introducing the sequences for the single-guide RNAs (sgRNAs) into an AAV vector plasmid,  
each driven by the U6 promoter paired with mCherry as a red fluorescent marker (**Fig. 1B**). To  
55 test the effect of  $\alpha 3$  knockdown ( $\alpha 3$ KD) on sleep and spectral activity, we recorded cortical  
oscillations using frontal electroencephalographic (EEG) electrodes and nuchal muscle  
electromyographic (EMG) electrodes before and after we introduced AAV- $\alpha 3$ -sgRNA-mCherry  
into the TRN via chronically implanted guide cannulae (**Fig. 1B**).

$\alpha 3$ KD in TRN PV neurons resulted in a significant increase in NREM sleep time ( $n=7$   
histologically confirmed cases; one-tailed paired t-test,  $t(6) = -2.25$ ,  $p = 0.03$ ) [means (standard  
error (SEM): BL = 53.02 (1.68),  $\alpha 3$ KD = 56.77 (1.92)] and a decrease in wakefulness during the  
light period when compared with baseline (BL) recordings (**Fig. 1C, D**). REM sleep was  
60 unchanged. Power spectral analysis of NREM sleep oscillations revealed a marked change in the  
quality of NREM sleep, whereby delta power was significantly higher in the  $\alpha 3$ KD condition  
(**Fig. 1E**; one-tailed paired t-test,  $t(6) = -2.4$ ,  $p = 0.027$ ; means (SEM): BL = 38.9(4.8),  $\alpha 3$ KD =  
47.06(2.2)). We found no change in any other frequency bands in NREM, and no changes in  
any frequency bands of wakefulness or REM sleep (**Fig. S1**). We observed a significant  
65 reduction in the proportion of shortest bout durations (**Fig. S2**), suggesting more consolidated  
NREM sleep following  $\alpha 3$ KD. Analysis of sleep spindles using a recently validated algorithm  
(14) did not identify any difference in spindle density, frequency or duration (**Fig. S3**). No  
significant changes in NREM sleep time were found during the mouse active (dark) period (**Fig.**  
**S4**). No NREM or delta effects were observed in three mice that showed no AAV- $\alpha 3$ -sgRNA-  
70 mCherry transduction in TRN (**Fig. S5**).

In humans, delta oscillations are most prominent in the deepest stage of NREM sleep,  
N3. However, in mice NREM is not generally split into stages. Nevertheless, mouse NREM  
probably also has degrees of depth which are not evident using standard scoring approaches. In  
humans, arousal threshold increases with depth of sleep; humans are more likely to awaken from  
75 the lighter stages N1 or N2 (15). Thus, to separate lighter from deeper NREM sleep in mice, we  
analyzed delta oscillations at NREM→REM and NREM→wakefulness transitions. The  
heightened delta power associated with  $\alpha 3$ KD was only evident during deeper NREM sleep  
immediately preceding transitions to REM sleep (**Fig. 1F-H**) [means (standard error (SEM): BL  
= 2.31 (0.16),  $\alpha 3$ KD = 2.77 (0.16); 22.3(10.04)% increase;  $t(6) = 2.18$ ,  $p = 0.04$ ]. No difference  
80 was apparent in NREM sleep before transitions to wake (**Fig. 1I-K**). Similarly, no change in  
delta power was seen during NREM sleep in the initial phase of transitions from wakefulness to  
NREM sleep (**Fig. S6**).

Selective deletion of  $\alpha 3$  subunits in TRN PV neurons requires the combination of  
selective expression of Cas9 in PV neurons and sgRNA targeting  $\alpha 3$  subunits in the same cells.

85 Furthermore, mCherry (red; marker of sgRNA) was expressed in the majority of TRN PV  
neurons (green and blue) within the core of the injection site (**Fig. 2A**). In the seven  $\alpha 3$ KD-  
confirmed mice, we found a high percentage of PV+ TRN neurons (GFP+:  $90 \pm 4\%$ ) were  
transduced by AAV- $\alpha 3$ -sgRNA-mCherry, and a large proportion of TRN ( $90 \pm 4\%$ ) area was  
covered (**Fig. 2B**). The change in NREM time strongly correlated (Pearson correlation;  $\rho = 0.74$ ,  
90  $p = 0.03$ ) to the extent of viral transduction of PV+ TRN neurons (**Fig. 2C**). In preliminary work  
prior to *in vivo* experiments, we confirmed that Cas9 expression (marked by GFP co-expression)  
was selective for PV neurons by immunohistochemical staining with PV antibodies (blue  
secondary antibodies) (**Fig. 2E**), consistent with the previously published validation of Cas9  
selective expression in PV+ neurons in this mouse model (16).

95 In a separate group of mice, we verified a functional ablation of GABA<sub>A</sub> receptors in  
whole-cell patch-clamp recordings from TRN PV neurons *in vitro*. In control voltage-clamp  
recordings from TRN PV neurons held at -70 mV in PV-tdTomato mice (which serve as wild  
type controls with a visual marker of the correct cell phenotype), spontaneous inhibitory  
postsynaptic currents (sIPSCs) were observed in the presence of glutamate receptor antagonists  
100 (20  $\mu$ M 6-cyano-7-nitroquinoxaline-2,3-dione +50  $\mu$ M D-(2R)-amino-5-phosphonopentanoic  
acid). To enhance the driving force for chloride, recordings were made using a patch solution  
with a high chloride concentration. Thus, IPSCs were detected as inward currents. In PV-Cas9  
mice, sIPSCs were significantly reduced in recordings from green (PV-Cas9/GFP) and red  
(transduced with AAV- $\alpha 3$ -sgRNA-mCherry) fluorescent TRN neurons [Frequency: PV-  
105 tdTomato:  $3.47 \pm 0.75$ Hz (N=6 from four animals); PV-Cas9+AAV- $\alpha 3$ -sgRNA:  $1.01 \pm 0.53$  (N=5  
from four animals);  $t(9)=2.560$ ,  $p=0.031$ , t-test. Amplitude: PV-tdTomato:  $-38.4 \pm 4.6$  pA (N=6);  
PV-Cas9+AAV- $\alpha 3$ -sgRNA :  $-42.1 \pm 7.7$  pA (N=3 from two animals, in the other recordings  
sIPSCs were not detectable),  $t(7)=0.4426$ ,  $p=0.67$ , t-test] (**Fig. 2D**). Residual sIPSCs in PV+  
TRN neurons in PV-Cas9 mice with  $\alpha 3$ KD retained sensitivity to an  $\alpha 3$  selective positive  
110 allosteric modulator, TP003 [1 $\mu$ M TP003 increased sIPSC decay time by  $13.9 \pm 2.1\%$ ,  $t(2)=7.228$ ,  
 $p=0.02$ , N=3, paired t-test], suggesting that other  $\alpha$  subunits were not upregulated in response to  
the  $\alpha 3$ KD.

115 In another group of mice, we performed the same *in vivo* experimental protocol with a  
control AAV vector targeting the GABA<sub>A</sub>R  $\alpha 1$  subunit. The TRN is devoid of  $\alpha 1$  subunits, so  
this experiment controls for non-specific genetic cutting. In these mice (n=7), we found no  
change in the amount of NREM sleep, wakefulness or REM sleep following the  $\alpha 1$ KD (**Fig. 3A**,  
**B**). Moreover, there was no change in the quality of NREM sleep, as measured by delta wave  
power (**Fig. 3C**). Indeed, no frequency bands of NREM sleep, wakefulness or REM sleep were  
altered. The time-frequency analysis at NREM-REM transitions (**Fig. 3D-F**) and at NREM-  
120 Wake transitions (**Fig. 3G-I**) showed no changes. Our histologic protocol confirmed a similar  
degree of targeting success (**Fig. S7**).

125 In this study, we used cell-type and region-specific CRISPR-Cas9 gene editing *in vivo* to  
test the functional role of GABAergic inhibition onto TRN neurons in controlling sleep  
physiology. To the best of our knowledge this is the first time that CRISPR-Cas9 technology has  
been used *in vivo* to alter thalamocortical oscillations. We found that knockdown of  $\alpha 3$ -  
containing GABA receptors, confirmed using *in vitro* recording of sIPSCs, increases NREM  
sleep time and the power of NREM delta oscillations during the sleep period of mice. Our novel  
analyses identified a deep sleep state prior to NREM-REM transitions which was particularly

130 strongly affected by  $\alpha 3$ KD. The selectivity of our manipulations was confirmed by our control experiments targeting a closely related subunit,  $\alpha 1$ , which is not expressed by TRN neurons.

135 There is an emerging consensus that depolarization of TRN neurons during NREM is an effective way to promote deep sleep (11). TRN neurons receive GABAergic inputs from basal forebrain, lateral hypothalamus and globus pallidus, and several of these neuronal groups maintain a high discharge rate during NREM sleep (17–19). Thus, withdrawal of these inputs by  
140 removing their postsynaptic targets will lead to a higher discharge rate of TRN neurons during NREM sleep, particularly during deeper stages of NREM prior to REM sleep when excitatory inputs from brainstem aminergic cell groups wane. In turn, increased activity of TRN GABAergic neurons will lead to hyperpolarization of thalamocortical relay neurons, bringing their membrane potential into the correct range to generate delta oscillations. This interpretation of our results is consistent with previous work which suggested that modulating the polarization level and discharge rate of TRN neurons affects delta oscillations and NREM sleep (11, 17, 18, 20–22).

145 Our findings differ from previous work which examined constitutive global  $\alpha 3$  subunit KO mice (23). However, in the constitutive knockout there was no reduction in sIPSC frequency compared to controls in TRN neurons; in fact, there was a modest increase in frequency, plus a significant increase in amplitude, suggesting a developmental compensation. Conversely, we show a significant reduction in sIPSC frequency. Here, the ablation was performed in the adult brain, so developmental compensation was circumvented, which is evident by residual sIPSCs retaining sensitivity to an  $\alpha 3$  selective positive allosteric modulator. Therefore, functional  
150 ablation of  $\alpha 3$  subunits in adults was feasible with the CRISPR-Cas9 approach and, importantly, allowed us to unravel the role of the  $\alpha 3$  subunits in sleep-wake patterns and EEG profiles.

155 In conclusion, CRISPR-Cas9 cell and region-specific gene editing of  $\alpha 3$  subunits in adult mice identified a functional role of GABA<sub>A</sub> receptors on TRN PV neurons in regulating deep NREM sleep. Pharmacological agents which allosterically increase the activity of GABA<sub>A</sub> receptors containing the  $\alpha 1$  or  $\alpha 3$  subunits are widely used hypnotics. Unfortunately, they promote light sleep with reduced delta power (9, 10, 24). Our results suggest that the delta suppressing effect of z-drugs comes from potentiating the  $\alpha 3$  containing GABA<sub>A</sub>Rs of the TRN (i.e. the opposite effect that we report here;  $\alpha 3$ KD leads to increased delta power). Clinically, this is a problem because high NREM delta waves of deep sleep are restorative, important for  
160 memory consolidation (25) and clearance of toxic metabolites (3). Here knockdown of  $\alpha 3$  subunits on TRN neurons enhanced deep sleep while not negatively affecting other sleep oscillations or wake power spectra. Thus, our results suggest that a pharmacological agent which antagonizes  $\alpha 3$  subunits, either on its own or in combination with positive allosteric agonism of  $\alpha 1$  subunits would be an ideal hypnotic to promote deep, restorative sleep.

165

## References and Notes:

1. G. Tononi, C. Cirelli, Sleep function and synaptic homeostasis. *Sleep Med. Rev.* **10**, 49–62 (2006).
2. M. Dworak, R. W. McCarley, T. Kim, A. V Kalinchuk, R. Basheer, Sleep and brain energy levels: ATP changes during sleep. *J. Neurosci.* **30**, 9007–9016 (2010).
- 170 3. L. Xie, H. Kang, Q. Xu, M. J. Chen, Y. Liao, M. Thiyagarajan, J. O'Donnell, D. J. Christensen, C. Nicholson, J. J. Iliff, T. Takano, R. Deane, M. Nedergaard, Sleep Drives Metabolite Clearance from the Adult Brain. *Science.* **342**, 373–377 (2013).
4. M. R. Dolsen, P. Cheng, J. T. Arnedt, L. Swanson, M. D. Casement, H. S. Kim, J. R. Goldschmied, R. F. Hoffmann, R. Armitage, P. J. Deldin, Neurophysiological correlates of suicidal ideation in major depressive disorder: Hyperarousal during sleep. *J. Affect. Disord.* **212**, 160–166 (2017).
- 175 5. E. Stepanski, J. Lamphere, P. Badia, F. Zorick, T. Roth, Sleep fragmentation and daytime sleepiness. *Sleep.* **7**, 18–26 (1984).
6. J. G. Ellis, M. L. Perlis, L. F. Neale, C. A. Espie, C. H. Bastien, The natural history of insomnia: focus on prevalence and incidence of acute insomnia. *J. Psychiatr. Res.* **46**, 1278–1285 (2012).
- 180 7. G. P. Luz, T. M. Guimarães, T. E. Weaver, L. E. Nery, L. O. E Silva, L. Badke, G. Coelho, A. Millani-Carneiro, S. Tufik, L. Bittencourt, Impaired sustained attention and lapses are present in patients with mild obstructive sleep apnea. *Sleep Breath.* **20**, 681–687 (2016).
- 185 8. S. A. Sands, P. I. Terrill, B. A. Edwards, L. Taranto Montemurro, A. Azarbarzin, M. Marques, C. M. de Melo, S. H. Loring, J. P. Butler, D. P. White, A. Wellman, Quantifying the Arousal Threshold Using Polysomnography in Obstructive Sleep Apnea. *Sleep.* **41**, 1–9 (2018).
- 190 9. D. S. Uygun, Z. Ye, A. Y. Zecharia, E. C. Harding, X. Yu, R. Yustos, A. L. Vyssotski, S. G. Brickley, N. P. Franks, W. Wisden, Bottom-Up versus Top-Down Induction of Sleep by Zolpidem Acting on Histaminergic and Neocortex Neurons. *J. Neurosci.* **36**, 11171–11184 (2016).
10. C. Alexandre, A. Dordal, R. Aixendri, A. Guzman, M. Hamon, J. Adrien, Sleep-Stabilizing Effects of E-6199, Compared to Zopiclone, Zolpidem and THIP in Mice. *Sleep.* **31**, 259–270 (2008).
- 195 11. L. D. Lewis, J. Voigts, F. J. Flores, L. I. Schmitt, M. A. Wilson, M. M. Halassa, E. N. Brown, Thalamic reticular nucleus induces fast and local modulation of arousal state. *Elife.* **4**, 1–23 (2015).
- 200 12. R. W. Olsen, W. Sieghart, GABA A receptors: subtypes provide diversity of function and



pharmacology. *Neuropharmacology*. **56**, 141–148 (2009).

13. H. Hörtnagl, R. O. Tasan, A. Wieselthaler, E. Kirchmair, W. Sieghart, G. Sperk, Patterns of mRNA and protein expression for 12 GABAA receptor subunits in the mouse brain. *Neuroscience*. **236**, 345–372 (2013).
- 205 14. D. S. Uygun, F. Katsuki, Y. Bolortuya, D. D. Aguilar, J. T. McKenna, S. Thankachan, R. W. McCarley, R. Basheer, R. E. Brown, R. E. Strecker, J. M. McNally, Validation of an automated sleep spindle detection method for mouse electroencephalography. *Sleep*. **42**, 1–13 (2019).
- 210 15. M. H. Kryger, T. Roth, W. C. Dement, *Principles and Practice of Sleep Medicine* (Elsevier, 2005; <https://linkinghub.elsevier.com/retrieve/pii/B0721607977X50010>).
- 215 16. R. J. Platt, S. Chen, Y. Zhou, M. J. Yim, L. Swiech, H. R. Kempton, J. E. Dahlman, O. Parnas, T. M. Eisenhaure, M. Jovanovic, D. B. Graham, S. Jhunjhunwala, M. Heidenreich, R. J. Xavier, R. Langer, D. G. Anderson, N. Hacohen, A. Regev, G. Feng, P. A. Sharp, F. Zhang, CRISPR-Cas9 knockin mice for genome editing and cancer modeling. *Cell*. **159**, 440–455 (2014).
17. S. Thankachan, F. Katsuki, J. T. McKenna, C. Yang, C. Shukla, K. Deisseroth, D. S. Uygun, R. E. Strecker, R. E. Brown, J. M. McNally, R. Basheer, Thalamic Reticular Nucleus Parvalbumin Neurons Regulate Sleep Spindles and Electrophysiological Aspects of Schizophrenia in Mice. *Sci. Rep.* **9**, 1–16 (2019).
- 220 18. C. G. Herrera, M. C. Cadavieco, S. Jegó, A. Ponomarenko, T. Korotkova, A. Adamantidis, Hypothalamic feedforward inhibition of thalamocortical network controls arousal and consciousness. *Nat. Neurosci.* **19**, 290–298 (2016).
- 225 19. A. Clemente-Perez, S. R. Makinson, B. Higashikubo, S. Brovarney, F. S. Cho, A. Urry, S. S. Holden, M. Wimer, C. Dávid, L. E. Fenno, L. Acsády, K. Deisseroth, J. T. Paz, Distinct Thalamic Reticular Cell Types Differentially Modulate Normal and Pathological Cortical Rhythms. *Cell Rep.* **19**, 2130–2142 (2017).
20. F. Espinosa, M. A. Torres-Vega, G. A. Marks, R. H. Joho, Ablation of Kv3.1 and Kv3.3 Potassium Channels Disrupts Thalamocortical Oscillations In Vitro and In Vivo. *J. Neurosci.* **28**, 5570–5581 (2008).
- 230 21. R. H. Joho, C. S. Ho, G. A. Marks, Increased gamma- and decreased delta-oscillations in a mouse deficient for a potassium channel expressed in fast-spiking interneurons. *J. Neurophysiol.* **82**, 1855–1864 (1999).
- 235 22. R. Ochoa-Sanchez, S. Comai, B. Lacoste, F. R. Bambico, S. Dominguez-Lopez, G. Spadoni, S. Rivara, A. Bedini, D. Angeloni, F. Fraschini, M. Mor, G. Tarzia, L. Descarries, G. Gobbi, Promotion of Non-Rapid Eye Movement Sleep and Activation of Reticular Thalamic Neurons by a Novel MT2 Melatonin Receptor Ligand. *J. Neurosci.* **31**, 18439–18452 (2011).

- 240 23. R. Winsky-Sommerer, A. Knapman, D. E. Fedele, C. M. Schofield, V. V. Vyazovskiy, U. Rudolph, J. R. Huguenard, J.-M. Fritschy, I. Tobler, Normal sleep homeostasis and lack of epilepsy phenotype in GABAA receptor  $\alpha 3$  subunit-knockout mice. *Neuroscience*. **154**, 595–605 (2008).
24. H. P. Landolt, L. A. Finelli, C. Roth, A. Buck, P. Achermann, A. A. Borbély, Zolpidem and sleep deprivation: different effect on EEG power spectra. *J. Sleep Res.* **9**, 175–183 (2000).
- 245 25. D. B. Headley, D. Paré, Common oscillatory mechanisms across multiple memory systems. *NPJ Sci. Learn.* **2**, 1–8 (2017).
26. L. Swiech, M. Heidenreich, A. Banerjee, N. Habib, Y. Li, J. Trombetta, M. Sur, F. Zhang, In vivo interrogation of gene function in the mammalian brain using CRISPR-Cas9. *Nat. Biotechnol.* **33**, 102–106 (2015).
- 250 27. S. Bae, J. Park, J.-S. Kim, Cas-OFFinder: a fast and versatile algorithm that searches for potential off-target sites of Cas9 RNA-guided endonucleases. *Bioinformatics*. **30**, 1473–5 (2014).
28. K. Labun, T. G. Montague, M. Krause, Y. N. Torres Cleuren, H. Tjeldnes, E. Valen, CHOPCHOP v3: expanding the CRISPR web toolbox beyond genome editing. *Nucleic Acids Res.* **47**, W171–W174 (2019).
- 255 29. M. J. Prerau, R. E. Brown, M. T. Bianchi, J. M. Ellenbogen, P. L. Purdon, Sleep Neurophysiological Dynamics Through the Lens of Multitaper Spectral Analysis. *Physiology (Bethesda)*. **32**, 60–92 (2017).

### Acknowledgments:

260 **Funding:** This work was supported by VA Biomedical Laboratory Research and Development Service Merit Awards I01 BX001404 (R.B.); I01 BX001356 and I01 BX004673 (R.E.B.); I01 BX4500 (J.M.M.); VA CDA IK2 BX004905 (D.S.U.); and NIH support from R21 NS079866 (R.B.), R01 MH039683 (R.E.B.), T32 HL07901 (D.S.U.). JTM received partial salary compensation and funding from Merck MISP (Merck Investigator Sponsored Programs) but has  
265 no conflict of interest with this work. D.S.U., J.T.M., J.M.M., R.E.S. and R.B. are Research Health Scientists at VA Boston Healthcare System, West Roxbury, MA. The contents of this work do not represent the views of the US Department of Veterans Affairs or the United States Government.

270 **Author contributions:** DSU: Conceptualization, Software, Formal analysis, Investigation, Data Curation, Writing – Original Draft, Writing – Review & Editing, Visualization, Supervision, Funding Acquisition. CY: Conceptualization, Formal analysis, Investigation, Data Curation, Writing – Original Draft, Writing – Review & Editing, Visualization, Funding Acquisition. ERT: Conceptualization, Formal analysis, Investigation, Data Curation, Writing – Review & Editing. FK: Conceptualization, Software, Formal analysis, Investigation, Writing – Review & Editing,  
275 Supervision. JTM: Formal analysis, Investigation, Visualization, Writing – Review & Editing. JMM: Conceptualization, Software, Writing – Review & Editing, Supervision, Funding

280

Acquisition. REB: Conceptualization, Resources, Data Curation, Writing – Original Draft, Writing – Review & Editing, Visualization, Supervision, Project administration, Funding Acquisition. RB: Conceptualization, Resources, Data Curation, Writing – Original Draft, Writing – Review & Editing, Visualization, Supervision, Project administration, Funding Acquisition.

**Competing interests:** Authors declare no competing interests.



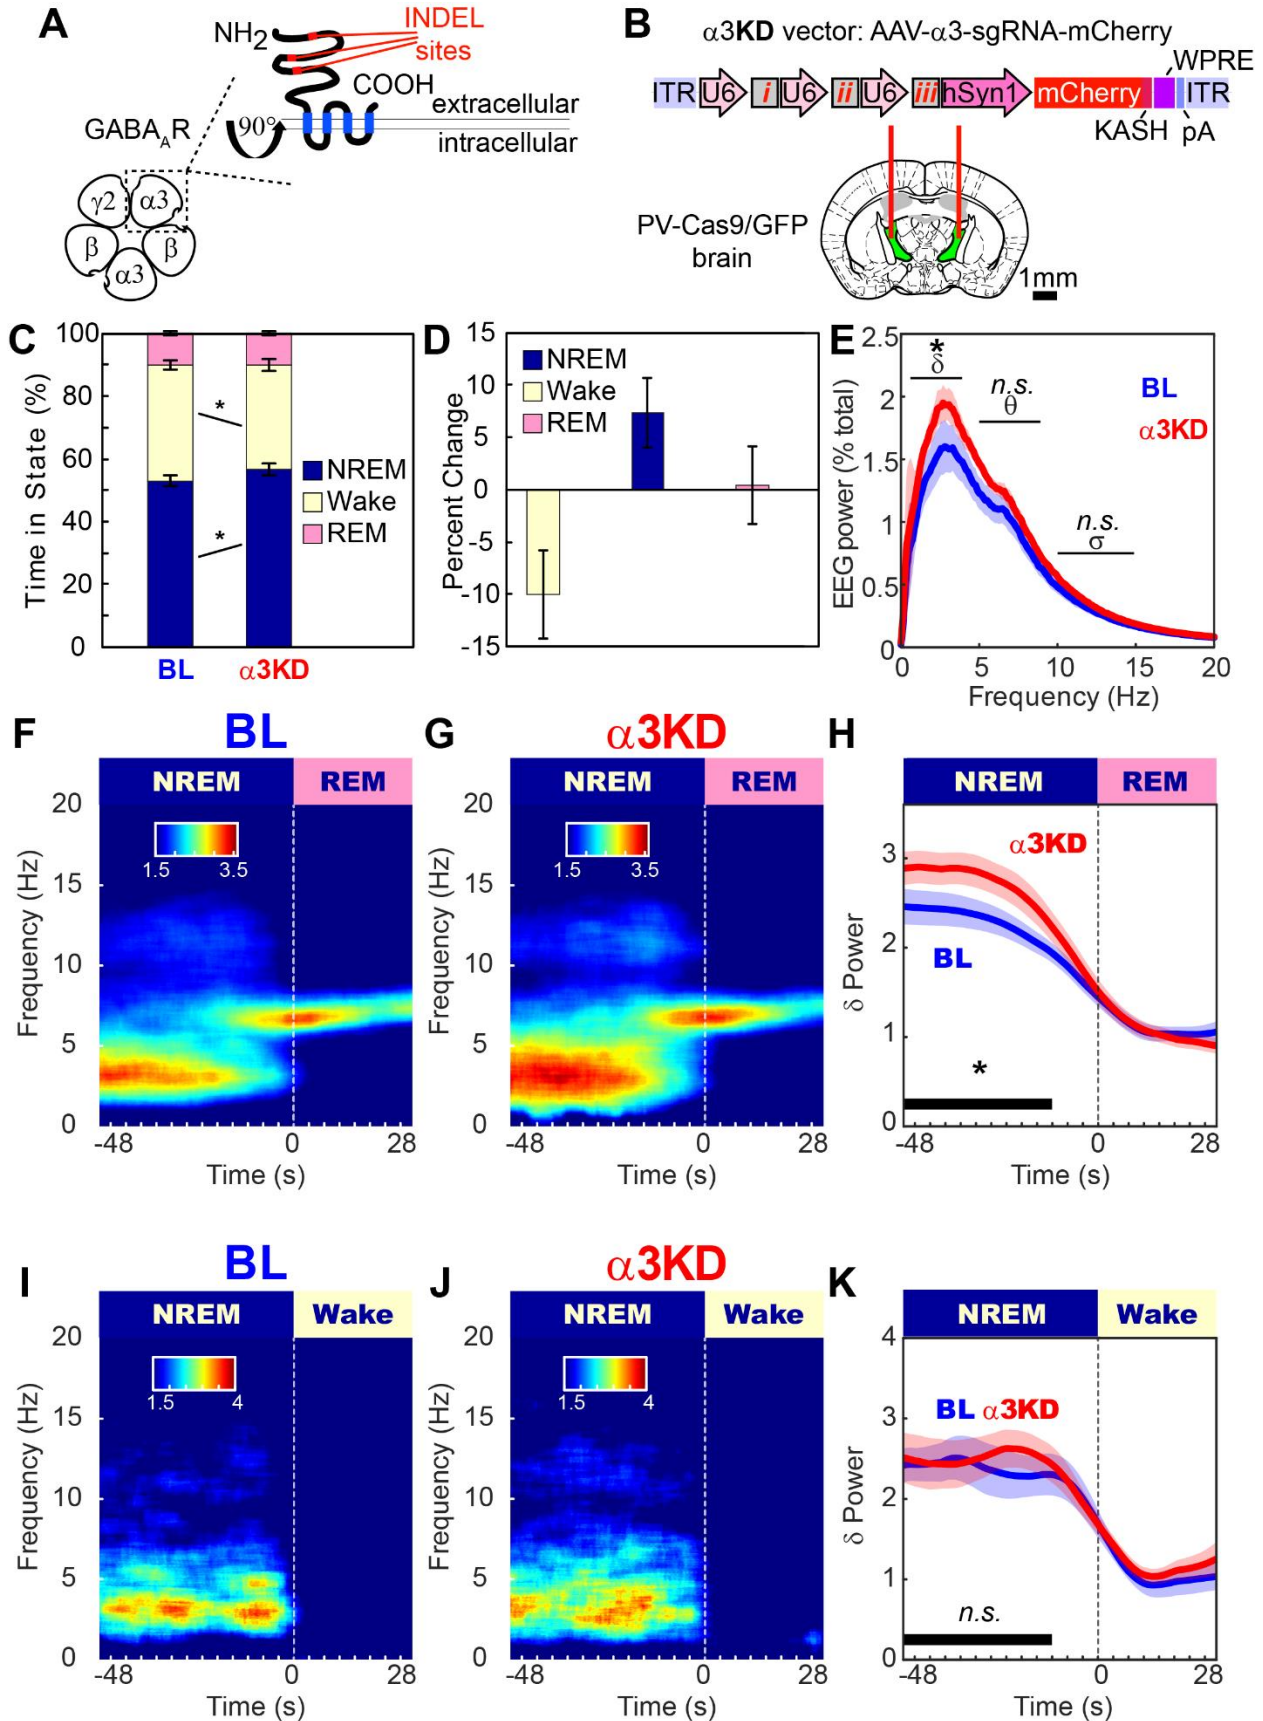

**Figure 1.  $\alpha$ 3KD in PV+TRN neurons increased NREM time, decreased wake time and increased NREM delta power, especially at NREM to REM transitions.**

285 A. The GABA<sub>A</sub>R is a pentameric heteromeric ion channel. CRISPR-Cas9 abscission was directed to three locations (INDEL sites) of the gene which correspond to the large extracellular region of the  $\alpha$ 3 subunit, a necessary structural component in GABA<sub>A</sub>Rs of the TRN. B. Adeno-Associated Viral vectors encoding three separate single-guide RNAs (*i, ii & iii*), each driven by its own U6 promoter, and the marker protein mCherry driven by the human synapsin promoter, were injected into the TRN region of PV-Cas9/GFP mice *in vivo* via guide cannulas. C. Compared with their baseline (BL) levels from before the  $\alpha$ 3KD was initiated, the mice spent more time in NREM and less time in Wake in the light inactive period. D. Percent change from baseline in wake and NREM shows that wake was reduced and NREM was increased by  $\alpha$ 3KD but REM sleep was unchanged. E. Compared with their baseline (BL) recordings,  $\alpha$ 3KD mice had higher NREM delta power, but unchanged sigma or theta power. F. Baseline time-frequency power dynamics presents a surge in delta power in NREM leading to a transition to REM. G. After  $\alpha$ 3KD, the delta power surge in NREM before a transition to REM was increased. H. Compared with their BL levels (blue),  $\alpha$ 3KD mice had higher delta power in the NREM before a transition to REM (red). I. BL time-frequency power dynamics presents a surge in delta power in NREM leading to a transition to wake as well. J.  $\alpha$ 3KD did not increase this delta power surge that occurs during NREM before a transition to wake. K. Compared with BL (blue),  $\alpha$ 3KD (red) did not correspond to a change in delta power in the NREM before a transition to wake.

290

295

300

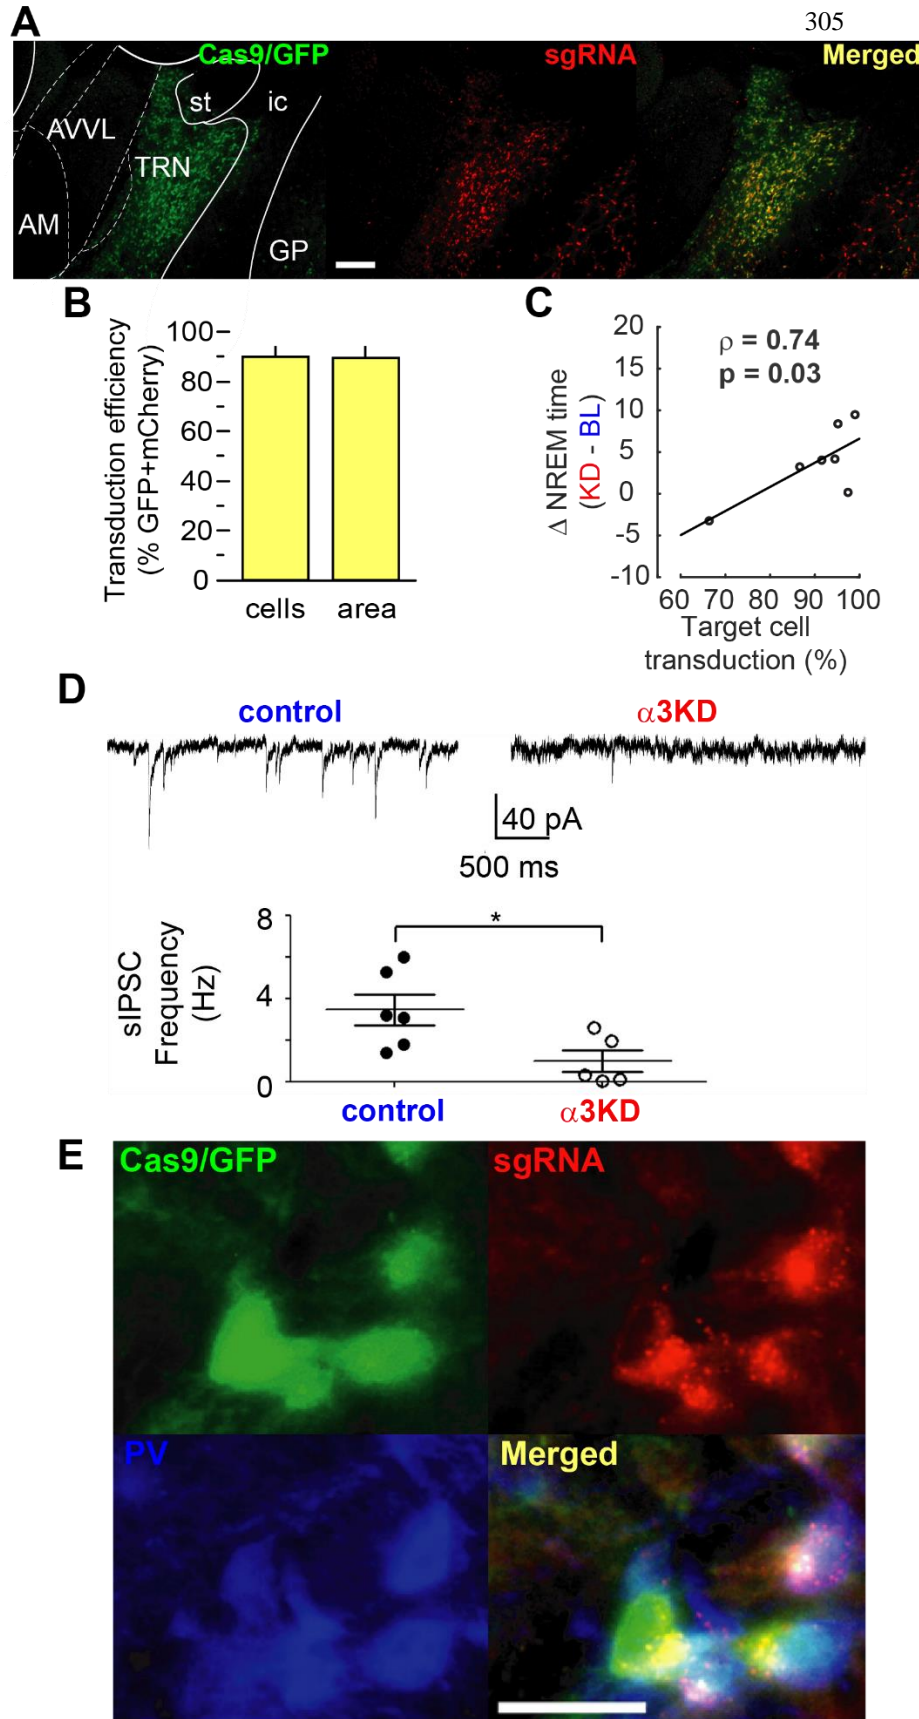

**Figure 2.  $\alpha$ 3KD in PV+ TRN neurons was validated by histology and *in vitro***

**electrophysiology.** A. GFP indicates rich Cas9 expression within the TRN region (green), mCherry reveals widespread transduction of the TRN region by the AAV vector delivering sgRNAs (red) with many of the cells in the area co-expressing both markers (merged; yellow).

310 Scale bar = 200  $\mu$ m. B. Percentages of target cells and target area that co-express markers reveal widespread delivery of sgRNAs to target cells in the mice used for *in vivo* studies. C. The increase in NREM sleep time evident in the light period was positively correlated with the percentage of PV+ TRN neurons transduced by the AAV expressing sgRNA targeting  $\alpha$ 3 subunits (GFP+mCherry). D. Compared with BL PV+ TRN neurons without KD (left), sIPSCs  
315 in  $\alpha$ 3KD PV+ TRN neurons were significantly reduced (right), with significantly reduced sIPSC frequency (bottom). E. High magnification imaging shows triple co-localization of Cas9 (GFP; green), sgRNA (mCherry; red) and PV (immunohistochemical stain; blue), demonstrating successful targeting of PV+ neurons within the TRN. Scale bar = 25  $\mu$ m.

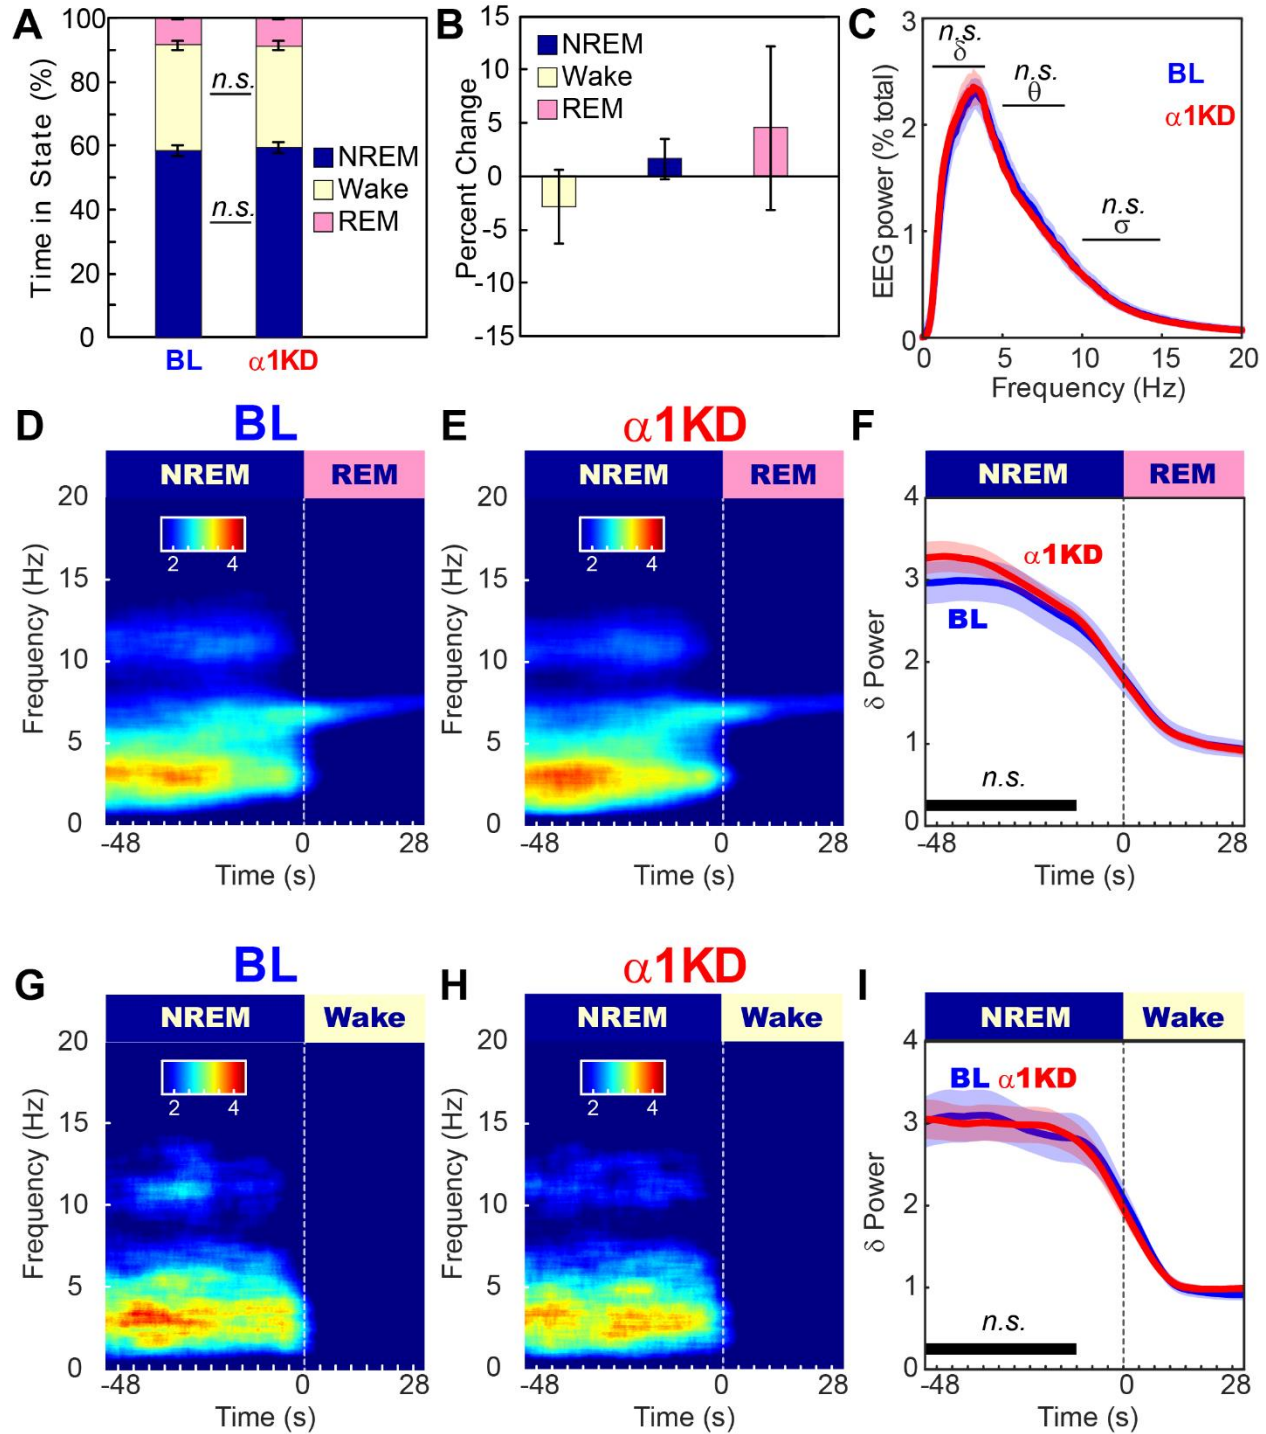



320 **Figure 3. The control cohort with  $\alpha$ 1KD in PV+TRN neurons displayed no changes to**  
**NREM or wake time, or delta power in any states, including transitions from NREM to**  
**REM, in the light inactive period.** A. Compared with their baseline levels (BL) recorded before  
the  $\alpha$ 1KD was initiated,  $\alpha$ 1KD mice spent the same proportion of time in Wake, NREM and  
REM sleep. B. Percent change from baseline in wake NREM and REM showed no consistent  
325 directional change after the  $\alpha$ 1KD. C. Compared with their baseline (BL) recordings,  $\alpha$ 1KD  
mice had the same amount of NREM delta, sigma and theta power. D. Baseline time-frequency  
power dynamics reveals a surge in delta power in NREM leading to a transition to REM. E.  
After  $\alpha$ 1KD, the delta power surge in NREM before a transition to REM is the same as in  
baseline records. F. Compared with baseline (blue),  $\alpha$ 1KD (red) mice had unaltered delta power  
in the NREM before a transition to REM ( $p = 0.27$ ). G. Baseline time-frequency power dynamics  
330 reveals a surge in delta power in NREM leading to a transition to wake. H.  $\alpha$ 1KD did not  
increase the delta power surge in NREM before a transition to wake. I. Compared with baseline  
(blue),  $\alpha$ 1KD (red) mice had unchanged delta power in the NREM before a transition to wake ( $p$   
 $= 0.49$ ).
